# Supplementary material
Source: publisher figshare collection journal article supplement (https://future-science-group.figshare.com/ndownloader/files/31378726)
Supplement: Supplementary file 1 [file 31378726]

**Supplementary table 1. Search strings for the three electronic databased used**

| **Electronic databases** | **Search string** |
| --- | --- |
| Pubmed | ((“Renal transplant” OR “kidney transplant” OR “kidney transplantation” OR “renal transplantation”) AND (metastasis OR metastatic OR metastases OR “cancer” OR neoplasm OR “tumour” OR “cancers” OR “tumours” OR “tumor” OR “tumors” OR neoplasms OR melanoma OR PTLD OR lymphoma) AND (chemotherapy OR immunotherapy OR “checkpoint inhibitors”)) AND (“calcineurin inhibitors” OR “calcineurin inhibitor” OR CNI OR tacrolimus OR cyclosporine OR everolimus OR sirolimus OR “mTOR inhibitors” OR “mTOR-inhibitors”)  Filters: English; 10 years; |
| Web of Science | ALL=(((Renal transplant) OR (kidney transplant) OR (kidney transplantation) OR (renal transplantation)) AND (metastasis OR metastatic OR metastases OR cancer OR neoplasm OR tumour OR cancers OR tumours OR tumor OR tumors OR neoplasms OR melanoma OR PTLD OR lymphoma) AND (chemotherapy OR immunotherapy OR (checkpoint inhibitors)) AND ((calcineurin inhibitors) OR (calcineurin inhibitor) OR CNI OR tacrolimus OR cyclosporine OR everolimus OR sirolimus OR (mTOR inhibitors) OR (mTOR-inhibitors))) |
| Scopus | ((“Renal transplant” OR “kidney transplant” OR “kidney transplantation” OR “renal transplantation”) AND (metastasis OR metastatic OR metastases OR “cancer” OR neoplasm OR “tumour” OR “cancers” OR “tumours” OR “tumor” OR “tumors” OR neoplasms OR melanoma OR PTLD OR lymphoma) AND (chemotherapy OR immunotherapy OR “checkpoint inhibitors”)) AND (“calcineurin inhibitors” OR “calcineurin inhibitor” OR CNI OR tacrolimus OR cyclosporine OR everolimus OR sirolimus OR “mTOR inhibitors” OR “mTOR-inhibitors”)  AND ( LIMIT-TO ( PUBYEAR , 2019 ) OR LIMIT-TO ( PUBYEAR , 2018 ) OR LIMIT-TO ( PUBYEAR , 2017 ) OR LIMIT-TO ( PUBYEAR , 2016 ) OR LIMIT-TO ( PUBYEAR , 2015 ) OR LIMIT-TO ( PUBYEAR , 2014 ) OR LIMIT-TO ( PUBYEAR , 2013 ) OR LIMIT-TO ( PUBYEAR , 2012 ) OR LIMIT-TO ( PUBYEAR , 2011 ) OR LIMIT-TO ( PUBYEAR , 2010 ) OR LIMIT-TO ( PUBYEAR , 2009 ) ) AND ( LIMIT-TO ( LANGUAGE , "English" ) ) |
